# Supplementary material for: Lamium album Flower Extracts: A Novel Approach for Controlling Fusarium Growth and Mycotoxin Biosynthesis
Source: MDPI journal article supplement (doi:10.3390/toxins15110651), 2023-11-13
Supplement: s1 [file s1]

**Table S1.** The effect of different concentrations of *L. album* flower extracts (2.5, 5, 7.5, and 10%) on *F. proliferatum* mycotoxins after 10 days of incubation at 25 °C on a PDA medium.

| Extract concentrations [%] | Mycotoxins level [µg/g]      |                           |                           |                             |
|----------------------------|------------------------------|---------------------------|---------------------------|-----------------------------|
|                            | FB <sub>1</sub>              | FB <sub>2</sub>           | FB <sub>3</sub>           | BEA*                        |
| Control (without extracts) | 59.35 ± 15.22 <sup>c</sup>   | 4.63 ± 1.42 <sup>ab</sup> | 0.83 ± 0.07 <sup>b</sup>  | 118.78 ± 19.04 <sup>c</sup> |
| 2.5                        | 48.28 ± 9.07 <sup>bc</sup>   | 4.44 ± 0.59 <sup>ab</sup> | 0.42 ± 0.17 <sup>ab</sup> | 77.84 ± 21.35 <sup>bc</sup> |
| 5                          | 39.40 ± 14.32 <sup>abc</sup> | 3.19 ± 1.09 <sup>ab</sup> | 0.30 ± 0.26 <sup>ab</sup> | 51.77 ± 14.18 <sup>ab</sup> |
| 7.5                        | 15.59 ± 7.13 <sup>ab</sup>   | 2.26 ± 1.34 <sup>ab</sup> | 0.21 ± 0.12 <sup>a</sup>  | 36.10 ± 4.87 <sup>ab</sup>  |
| 10                         | 7.24 ± 1.75 <sup>a</sup>     | 0.81 ± 0.19 <sup>a</sup>  | 0.08 ± 0.04 <sup>a</sup>  | 17.98 ± 7.82 <sup>a</sup>   |

All values are means of three replicates ± standard deviation. The superscripts of different letters in rows are significantly different (Tukey's HSD test, significant at  $p < 0.01$ ).

**Table S2.** The effect of different concentrations of *L. album* flower extracts (2.5, 5, 7.5, and 10%) on *F. culmorum* mycotoxins after 10 days of incubation at 25 °C on a PDA medium.

| Extract Concentrations [%] | Mycotoxins* level [µg/g] |                    |                     |                     |                   |                   |                   |
|----------------------------|--------------------------|--------------------|---------------------|---------------------|-------------------|-------------------|-------------------|
|                            | DON                      | 3- + 15-AcDON      | ZEN                 | ZEN-14S             | β-ZOL             | α-ZOL             | FUS-X             |
| Control (without extracts) | 165.35 ±                 | 201.69 ±           | 592.95 ±            | 887.08 ±            | 1.94 ±            | 0.28 ±            | 6.23 ±            |
|                            | 51.76 <sup>b</sup>       | 43.77 <sup>b</sup> | 106.71 <sup>b</sup> | 95.32 <sup>c</sup>  | 0.67 <sup>b</sup> | 0.10 <sup>b</sup> | 1.03 <sup>b</sup> |
| 2.5                        | 87.54 ±                  | 73.77 ±            | 293.49 ±            | 425.09 ±            | 0.62 ±            | 0.07 ±            | 2.74 ±            |
|                            | 8.75 <sup>ab</sup>       | 8.38 <sup>a</sup>  | 52.23 <sup>a</sup>  | 100.21 <sup>b</sup> | 0.24 <sup>a</sup> | 0.01 <sup>a</sup> | 1.37 <sup>a</sup> |
| 5                          | 36.683 ±                 | 30.80 ±            | 237.22 ±            | 199.01 ±            | 0.35 ±            | nd <sup>*a</sup>  | 1.27 ±            |
|                            | 5.77 <sup>a</sup>        | 12.35 <sup>a</sup> | 91.18 <sup>a</sup>  | 31.91 <sup>ab</sup> | 0.14 <sup>a</sup> |                   | 0.64 <sup>a</sup> |
| 7.5                        | 17.43 ±                  | 14.30 ±            | 73.64 ±             | 128.87 ±            | 0.05 ±            | nd <sup>a</sup>   | 0.45 ±            |
|                            | 6.33 <sup>a</sup>        | 4.18 <sup>a</sup>  | 20.33 <sup>a</sup>  | 36.09 <sup>a</sup>  | 0.01 <sup>a</sup> |                   | 0.37 <sup>a</sup> |
| 10                         | 5.3 ±                    | 5.45 ±             | 58.06 ±             | 64.76 ±             | nd <sup>a</sup>   | nd <sup>a</sup>   | 0.03±             |
|                            | 2.05 <sup>a</sup>        | 3.35 <sup>a</sup>  | 19.37 <sup>a</sup>  | 6.56 <sup>a</sup>   |                   |                   | 0.02 <sup>a</sup> |

All values are means of three replicates ± standard deviation. The superscripts of different letters in rows are significantly different (Tukey's HSD test, significant at  $p < 0.01$ ), \*nd—not detected.
